# Supplementary material
Source: HighWire-hosted journal article supplement (https://tobaccocontrol.bmj.com/highwire/filestream/166579/field_highwire_adjunct_files/0/tc-2022-057284supp001_data_supplement.pdf)
Supplement: tc-2022-057284supp001_data_supplement.pdf [file tc-2022-057284supp001_data_supplement.pdf]

## Supplementary Tables

Table S1. Waterpipe tobacco data inputs

| Variable                                             | Input value |               |             | Source                                                                                                          |
|------------------------------------------------------|-------------|---------------|-------------|-----------------------------------------------------------------------------------------------------------------|
|                                                      | Jordan      | Lebanon       | Palestine   |                                                                                                                 |
| Import duty tax, % of CIF/ex-factory price           | 0.0         | 35.1          | 0.00        | WHO 2021 [1]                                                                                                    |
| Specific excise tax per 20g, USD                     | 0.18        | 0.03          | 1.72        | WHO 2021 [1]                                                                                                    |
| Value added tax, % of retail price                   | 13.8        | 8.6           | 13.8        | WHO 2021 [1]                                                                                                    |
| Annual imports, trade value, USD                     | 4,447,191   | 28,076,527    | 808,859     | UN Comtrade 2019 [2]                                                                                            |
| Annual imports, netweight, kg                        | 909,208     | 3,042,453     | 79,760      | UN Comtrade 2019 [2]                                                                                            |
| CIF/ex-factory price per 20g, USD                    | 0.10        | 0.13          | 0.20        | Annual imports trade value/(netweight*1000/20)                                                                  |
| Discount café share, %                               | 3.9         | 4.3           | 48.1        | Chalak <i>et al.</i> , 2021 [3]                                                                                 |
| Premium café share, %                                | 37.7        | 41.4          | 24.4        | Chalak <i>et al.</i> , 2021 [3]                                                                                 |
| Discount home share, %                               | 21.8        | 25.8          | 10.7        | Chalak <i>et al.</i> , 2021 [3]                                                                                 |
| Premium home share, %                                | 36.7        | 28.5          | 16.8        | Chalak <i>et al.</i> , 2021 [3]                                                                                 |
| Discount café retail price, USD                      | 3.37        | 3.50          | 5.86        | Chalak <i>et al.</i> , 2021 [3]                                                                                 |
| Premium café retail price, USD                       | 7.38        | 7.92          | 7.62        | Chalak <i>et al.</i> , 2021 [3]                                                                                 |
| Discount home retail price, USD                      | 0.64        | 0.64          | 0.73        | Chalak <i>et al.</i> , 2021 [3]                                                                                 |
| Premium home retail price, USD                       | 1.02        | 0.78          | 2.40        | Chalak <i>et al.</i> , 2021 [3]                                                                                 |
| Discount café own price elasticity                   | -0.335      | -1.699        | -0.291      | Chalak <i>et al.</i> , 2021 [3]                                                                                 |
| Premium café own price elasticity                    | -0.674      | -2.312        | -1.120      | Chalak <i>et al.</i> , 2021 [3]                                                                                 |
| Discount home own price elasticity                   | -0.915      | -1.700        | -0.650      | Chalak <i>et al.</i> , 2021 [3]                                                                                 |
| Premium home own price elasticity                    | -0.601      | -1.949        | 0.196*      | Chalak <i>et al.</i> , 2021 [3]                                                                                 |
| Current use, %                                       | 10.9        | 39.5          | 12.9        | Chalak <i>et al.</i> , 2021 [3]                                                                                 |
| Illicit (non-tax paid) consumption, % of current use | 7.0         | 25.9          | 25.0        | Online reports [4,5]                                                                                            |
| Population size aged >15 years                       | 6,851,000   | 5,114,372     | 2,960,687   | World Bank [6]                                                                                                  |
| Number of annual 20g sessions                        | 361,190,280 | 1,339,392,106 | 217,858,689 | Current use * Population size * Mean number of waterpipes/day [3] * Mean number of heads/waterpipe [3] * 365.25 |

CIF: Cost, insurance, and freight; \*set to 0 following peer review

**Table S2.** Tax structures per 20g and market-weighted retail price of 20g of waterpipe tobacco for each simulated scenario, USD

| Country   | Scenario                              | CIF price | Import duty | Specific excise | Ad valorem excise | VAT  | Margin | Retail price |
|-----------|---------------------------------------|-----------|-------------|-----------------|-------------------|------|--------|--------------|
| Jordan    | Base                                  | 0.10      | 0.00        | 0.18            | 0.00              | 0.42 | 2.73   | 3.43         |
|           | Tax is 35.9% of retail price          | 0.10      | 0.00        | 1.32            | 0.00              | 0.68 | 3.48   | 5.57         |
|           |                                       |           |             |                 |                   |      |        |              |
| Lebanon   | Base                                  | 0.13      | 0.00        | 0.03            | 0.28              | 0.30 | 3.02   | 3.82         |
|           | Tax is 35.9% of retail price          | 0.13      | 0.06        | 2.04            | 0.00              | 0.66 | 5.44   | 8.38         |
|           |                                       |           |             |                 |                   |      |        |              |
| Palestine | Base                                  | 0.20      | 0.00        | 1.72            | 0.00              | 0.65 | 2.77   | 5.34         |
|           | Double government revenue from excise | 0.20      | 0.00        | 4.11            | 0.00              | 0.97 | 2.70   | 7.98         |

CIF: costs, insurance, and freight; VAT: Value Added Tax;

**Table S3.** Sensitivity analysis showing the impact of different parameter changes on consumption (C), government revenue from all taxes (G), and premature deaths averted (P), expressed as a percentage relative to the new scenario.

| Variable                                                         | Jordan |      |      | Lebanon |       |      | Palestine |      |      |
|------------------------------------------------------------------|--------|------|------|---------|-------|------|-----------|------|------|
|                                                                  | C      | G    | P    | C       | G     | P    | C         | G    | P    |
| Cost, insurance, and freight price or ex-factory price +50%      | -1.0   | -0.6 | +1.4 | -3.4    | -2.0  | +1.6 | -0.6      | -0.3 | +1.4 |
| Cost, insurance, and freight price or ex-factory price -50%      | +1.0   | +0.6 | -1.4 | +3.6    | +2.0  | -1.7 | +0.6      | +0.3 | -1.4 |
| Discount café own price elasticity lower 95% confidence interval | -0.4   | -0.4 | +0.1 | -0.3    | -0.3  | +0.1 | -4.8      | -4.9 | -0.4 |
| Discount café own price elasticity upper 95% confidence interval | +0.5   | +0.4 | -0.1 | +0.4    | +0.3  | -0.1 | +5.4      | +5.5 | +0.4 |
| Premium café own price elasticity lower 95% confidence interval  | -2.4   | -2.9 | -1.4 | -2.3    | -2.4  | -0.4 | -1.7      | -1.8 | -0.5 |
| Premium café own price elasticity upper 95% confidence interval  | +2.5   | +3.0 | +1.4 | +2.3    | +2.4  | +0.3 | +1.8      | +2.0 | +0.5 |
| Discount home own price elasticity lower 95% confidence interval | -2.9   | -2.2 | +1.9 | -0.9    | -0.8  | +0.6 | -2.7      | -2.5 | +1.0 |
| Discount home own price elasticity upper 95% confidence interval | +3.8   | +3.0 | -2.4 | +1.1    | +0.9  | -0.7 | +4.1      | +3.8 | -1.4 |
| Premium home own price elasticity lower 95% confidence interval  | -5.2   | -4.2 | +3.2 | -0.9    | -0.7  | +0.6 | N/A       | N/A  | N/A  |
| Premium home own price elasticity upper 95% confidence interval  | +6.3   | +5.0 | -3.4 | +1.0    | +0.8  | -0.7 | N/A       | N/A  | N/A  |
| Industry over-shift 10%                                          | -3.4   | -1.5 | +6.0 | -12.9   | -11.9 | +5.2 | -1.8      | -1.2 | +3.4 |
| Industry under-shift 10%                                         | +3.9   | +1.7 | -6.1 | +16.4   | +14.9 | -5.6 | +2.0      | +1.3 | -3.5 |

N/A: Not applicable as elasticity artificially set to 0 following peer review

## References

1. World Health Organization. WHO report on the global tobacco epidemic 2021: addressing new and emerging products [online]. Available at: <https://bit.ly/31slvCZ> [Accessed 05 November 2021].
2. United Nations. UN Comtrade Database [online]. Available at: <https://bit.ly/3GGaQVF> [Accessed 28 October 2021].
3. Chalak A, et al. Own-price and cross-price elasticities of demand for cigarettes and waterpipe tobacco in three Eastern Mediterranean countries: a volumetric choice experiment. *Tobacco control*. 2021. Epub 2021/07/02. doi: 10.1136/tobaccocontrol-2021-056616
4. Oxford Economics. Levant Illicit Tobacco 2019 [online]. Available at: <https://bit.ly/3dBmXt0> [Accessed 17.08.22].
5. Philip Morris International. Israel's COVID-19 measures have a promising impact on illicit cigarette trade [online]. Available at: <https://bit.ly/3dpKvkf> [Accessed 17.08.22].
6. World Bank. Data. Population, total [online]. Available at: <https://bit.ly/3pL8n61> [Accessed 28 October 2021].
